# Supplementary material for: Pickering high internal phase emulsion-based hydroxyapatite–poly(ε-caprolactone) nanocomposite scaffolds
Source: Royal Society of Chemistry journal article supplement (doi:10.1039/c5tb00093a), 2015-01-01
Supplement: c5tb00093a1.pdf [file c5tb00093a1.pdf]

## Electronic Supplementary Information (ESI)

### Pickering high internal phase emulsion-based hydroxyapatite/poly( $\epsilon$ -caprolactone) nanocomposite scaffolds

Yang Hu,<sup>a</sup> Huichang Gao,<sup>b</sup> Zhengshan Du,<sup>a</sup> Yixiao Liu,<sup>a</sup> Yu Yang<sup>a</sup> and  
Chaoyang Wang<sup>\*a</sup>

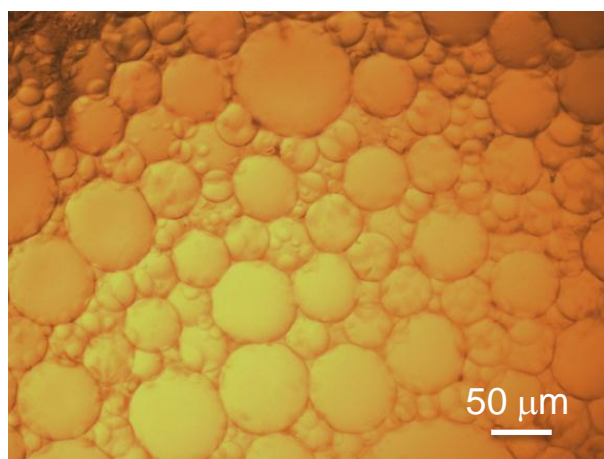

**Fig. S1** Optical microscope image of a typical stable Pickering HIPE H<sub>3</sub>P<sub>5</sub>-80.

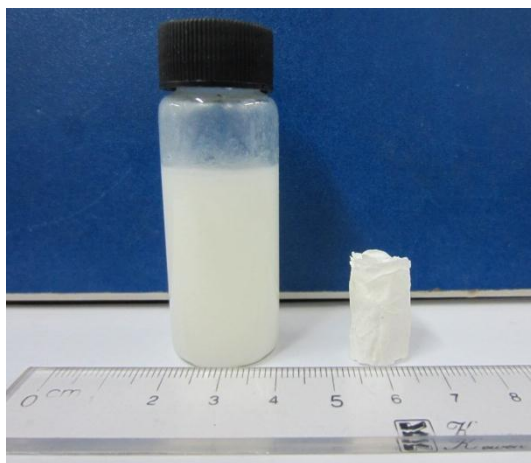

**Fig. S2** Digital photographs of typical sample H<sub>5</sub>P<sub>5</sub>-80 before and after air drying: left, Pickering HIPE and right, porous scaffold.

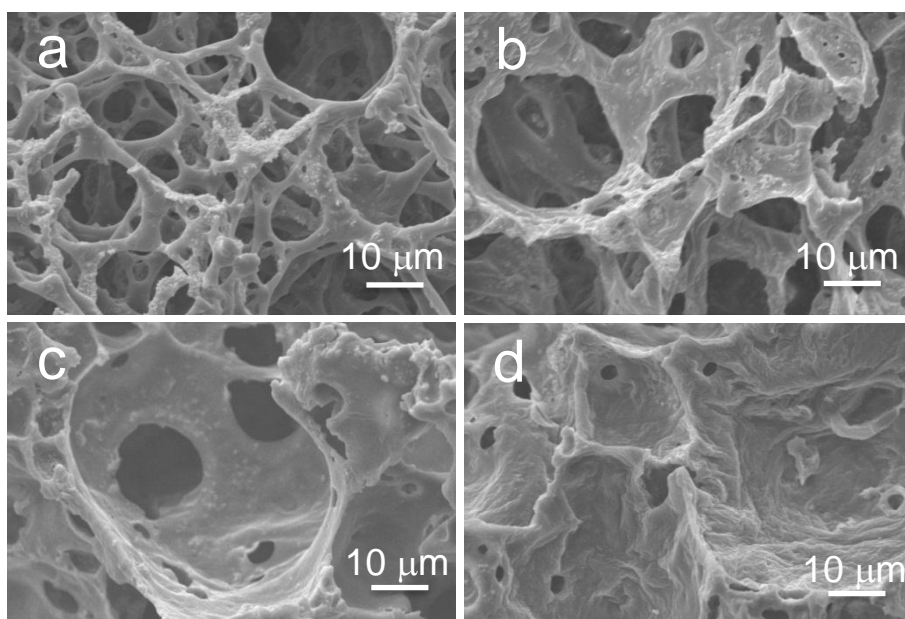

**Fig. S3** SEM micrographs of porous scaffolds prepared from Pickering HIPE (a)  $H_5P_{2.5-80}$ , (b)  $H_5P_{5-80}$ , (c)  $H_5P_{7.5-80}$  and (d)  $H_5P_{10-80}$  with the PCL concentrations of 2.5, 5, 7.5 and 10 w/v%, respectively.

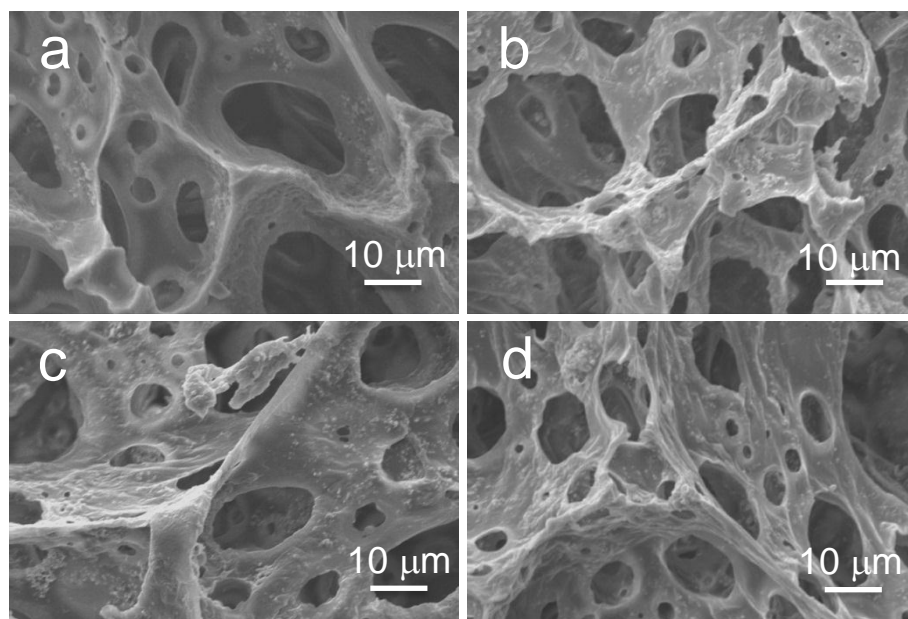

**Fig. S4.** SEM micrographs of porous scaffolds prepared from Pickering HIPE (a) H<sub>5</sub>P<sub>5</sub>-75, (b) H<sub>5</sub>P<sub>5</sub>-80, (c) H<sub>5</sub>P<sub>5</sub>-85 and (d) H<sub>5</sub>P<sub>5</sub>-90 with the internal phase volume fractions of 75, 80, 85 and 90 vol%, respectively.

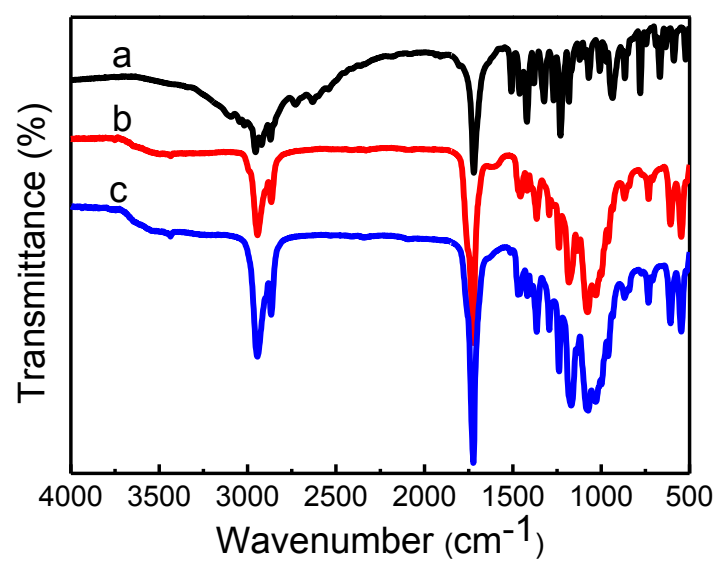

**Fig. S5.** FTIR spectra of (a) IBU, (b) scaffold H<sub>5</sub>P<sub>5</sub>-80 and (c) IBU-loaded scaffold H<sub>5</sub>P<sub>5</sub>-80.

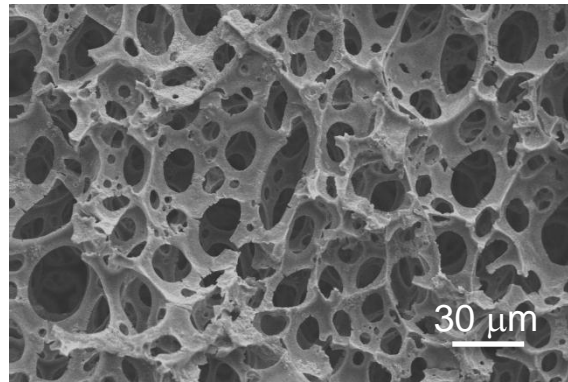

**Fig. S6** SEM image of IBU-loaded scaffold H<sub>5</sub>P<sub>5</sub>-80.

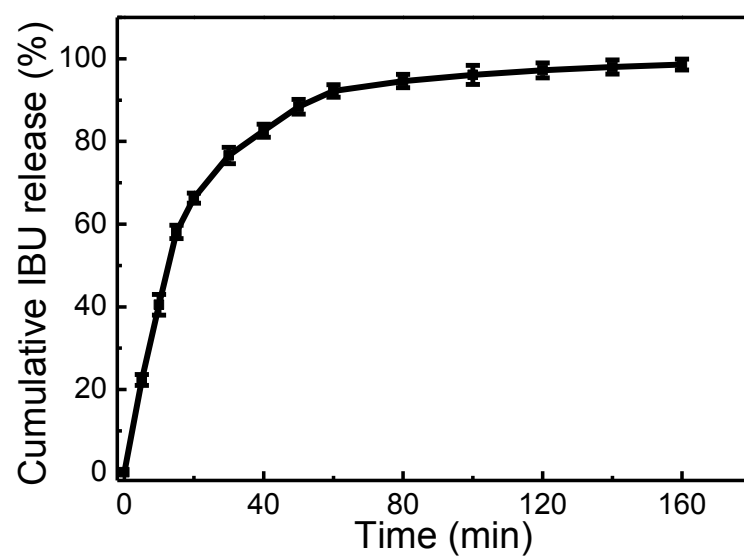

**Fig. S7** In vitro release curve of free IBU in PBS (pH 7.4) at 37 °C.
